# Supplementary material for: Strain, Doping, and Electronic Transport of Large Area Monolayer MoS2 Exfoliated on Gold and Transferred to an Insulating Substrate
Source: PubMed Central journal article supplement (PMC9280715; doi:10.1021/acsami.1c05185), 2021-06-24
Supplement: am1c05185_si_001.pdf [file am1c05185_si_001.pdf]

## Supporting Information

### **Strain, doping and electronic transport of large area monolayer MoS<sub>2</sub> exfoliated on gold and transferred to an insulating substrate**

Salvatore Ethan Panasci<sup>1,2</sup>, Emanuela Schilirò<sup>1</sup>, Giuseppe Greco<sup>1</sup>, Marco Cannas<sup>3</sup>, Franco M. Gelardi<sup>3</sup>, Simonpietro Agnello<sup>3,1,4</sup>, Fabrizio Roccaforte<sup>1</sup>, Filippo Giannazzo<sup>1\*</sup>

<sup>1</sup> *CNR-IMM, Strada VIII, 5 95121, Catania, Italy*

<sup>2</sup> *Department of Physics and Astronomy, University of Catania, Via Santa Sofia 64, 95123 Catania, Italy*

<sup>3</sup> *Department of Physics and Chemistry Emilio Segrè, University of Palermo, Via Archirafi 36, 90123 Palermo, Italy*

<sup>4</sup> *ATeN Center, Università degli Studi di Palermo, Viale delle Scienze, Edificio 18, 90128 Palermo, Italy*

E-mail: [filippo.giannazzo@imm.cnr.it](mailto:filippo.giannazzo@imm.cnr.it)

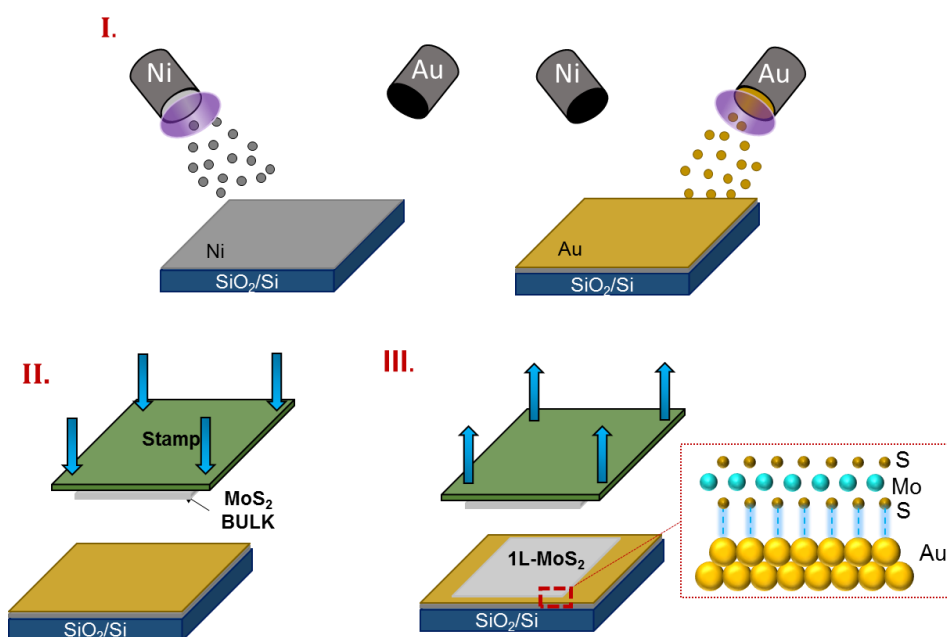

**Figure S1** Schematic illustration of the procedure for monolayer (1L) MoS<sub>2</sub> exfoliation on Au/Ni/SiO<sub>2</sub>. (I) Sequential sputtering of Ni (adhesion layer) and Au on the SiO<sub>2</sub>/Si substrate. (II) Pressing of bulk MoS<sub>2</sub> on the Au surface. (III) Separation of 1L-MoS<sub>2</sub> due to the strong interaction between S and topmost Au atoms.

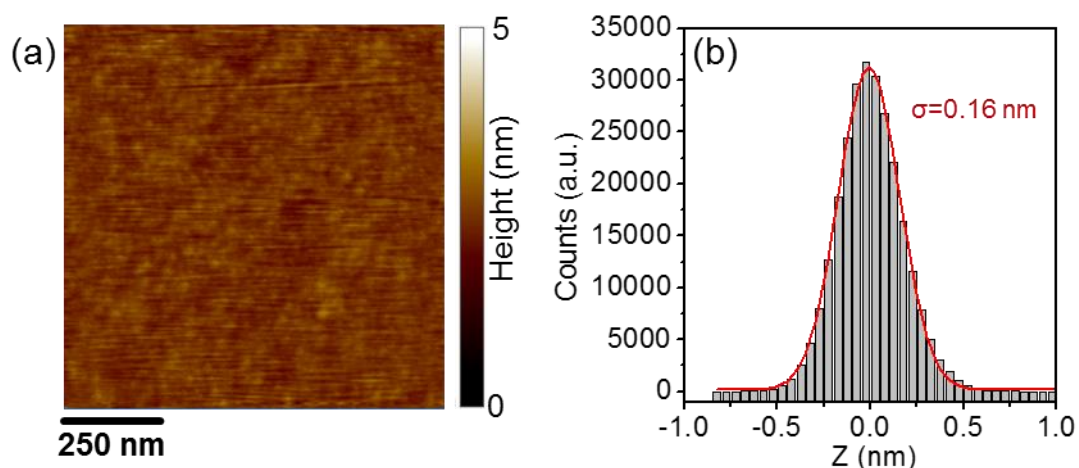

**Figure S2** (a) Tapping mode Atomic Force Microscopy image of the Au surface morphology in Au/Ni/SiO<sub>2</sub> samples. (b) Z-values distribution and Gaussian fit, with the standard deviation (roughness)  $\sigma = 0.16$  nm.

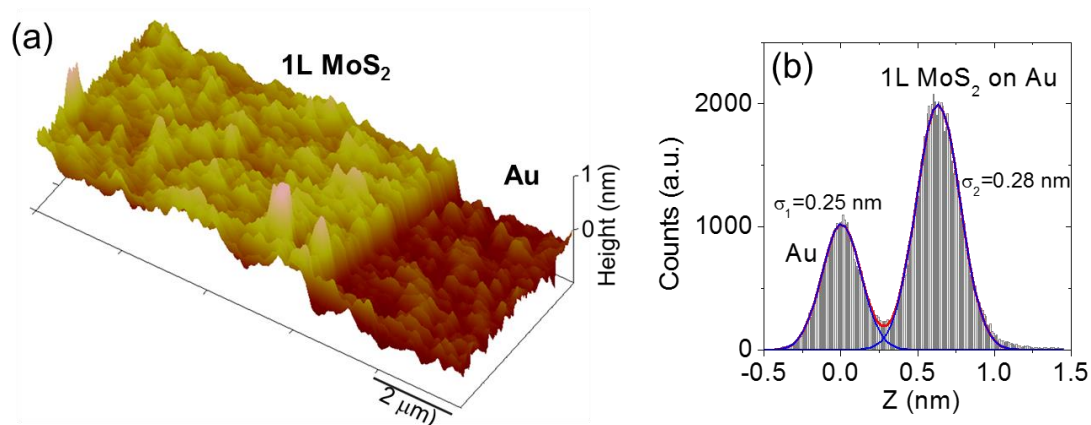

**Figure S3** 1L MoS<sub>2</sub> exfoliated on Au. (a) AFM morphology of a region where MoS<sub>2</sub> partially covers the Au surface. (b) Corresponding histogram of height distribution, showing two components, associated to the bare Au region and to 1L MoS<sub>2</sub>/Au. Very small and comparable values of roughness ( $\sigma_1=0.25$  nm and  $\sigma_2=0.28$  nm) can be deduced for both areas.

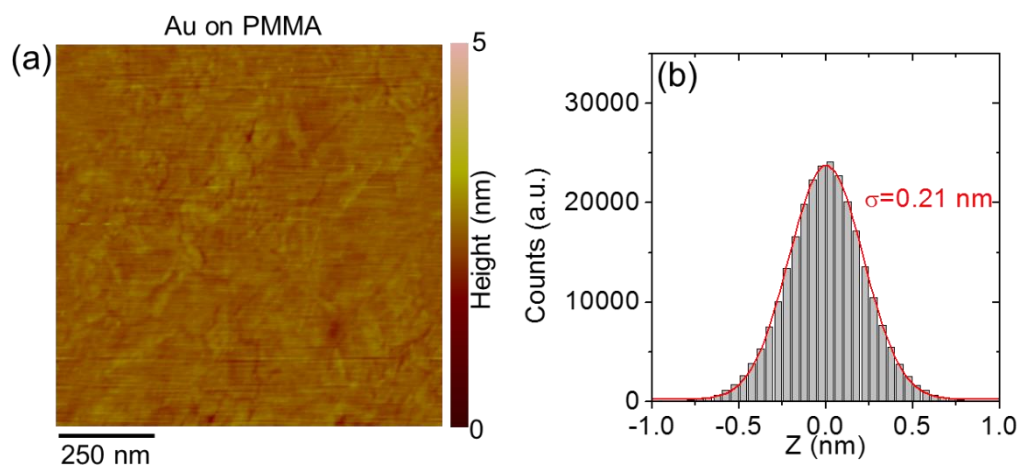

**Figure S4** (a) AFM morphology of the peeled gold on PMMA and (b) corresponding histogram of height distribution, showing a very small roughness of 0.21 nm, comparable with that of the Au/Ni film on SiO<sub>2</sub>.

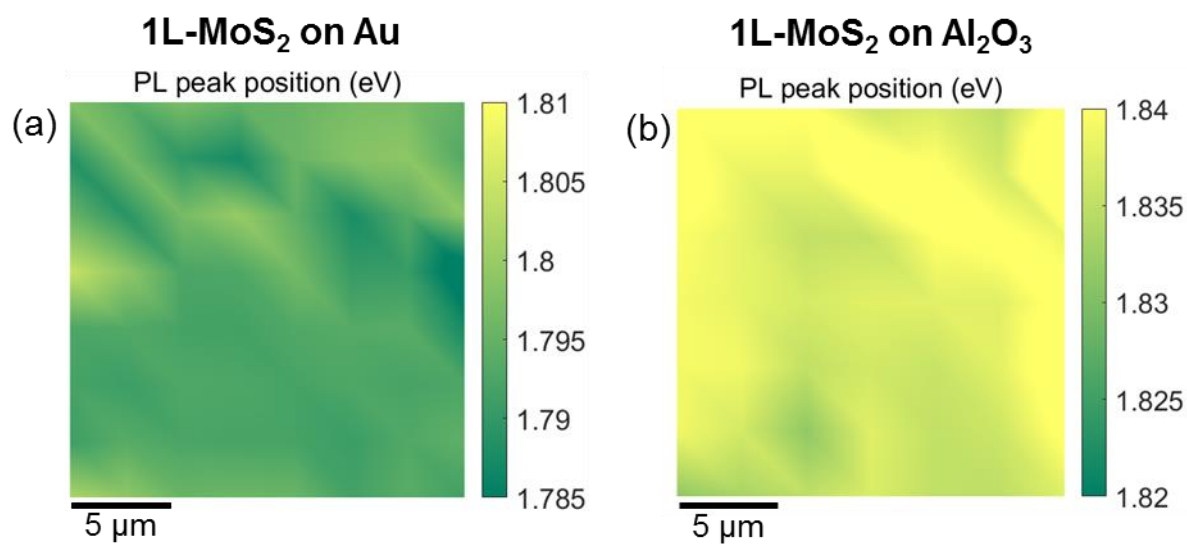

**Figure S5** Colour maps of the PL peak energy obtained from arrays of microPL spectra collected on 1L MoS<sub>2</sub> exfoliated on Au (a) and after transfer on Al<sub>2</sub>O<sub>3</sub> (b).

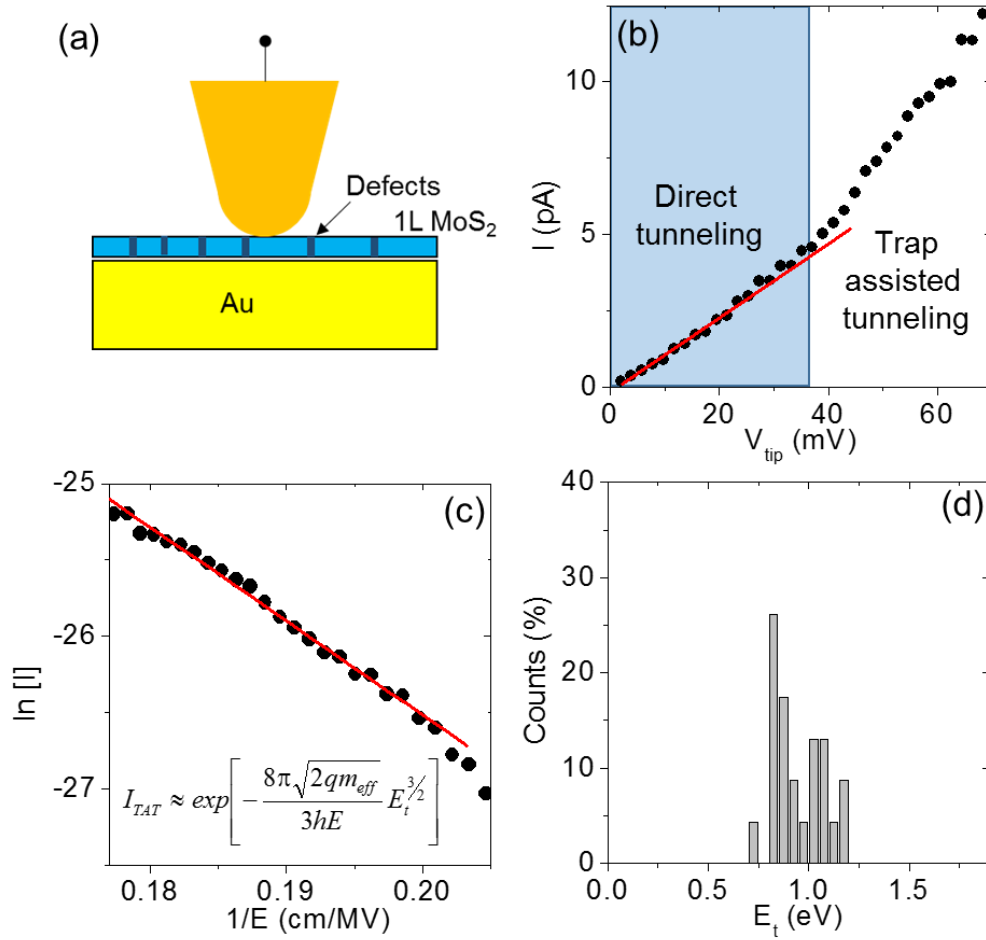

**Figure S6** (a) Schematic of the tip/MoS<sub>2</sub>/Au system, where the presence of defects (e.g. sulfur vacancies) in the 1L MoS<sub>2</sub> has been indicated. (b) Typical I-V<sub>tip</sub> curve, where two conduction regimes are indicated: a linear regime (at lower bias) ruled by direct tunnelling, and an exponential regime (at higher bias) ruled by trap-assisted-tunnelling. (c) Plot of ln(I) vs 1/E, demonstrating that current can be described by the trap-assisted-tunnelling equation (in the insert). Here, the electric field E was evaluated as  $E=(V_{tip}+V_{bb})/d$ , where  $V_{tip}$  is the tip bias,  $d=0.65$  nm is the thickness of 1L MoS<sub>2</sub> and  $V_{bb}=0.3$  V is the average value of the upward band bending of MoS<sub>2</sub> due to p-type doping induced by Au. The trap energy level  $E_t$  (referred to the conduction band edge) was evaluated from the linear fit. (d) Histogram of the  $E_t$  values obtained by fitting of all the I-V<sub>tip</sub> curves in Fig.5(d) of the main manuscript.

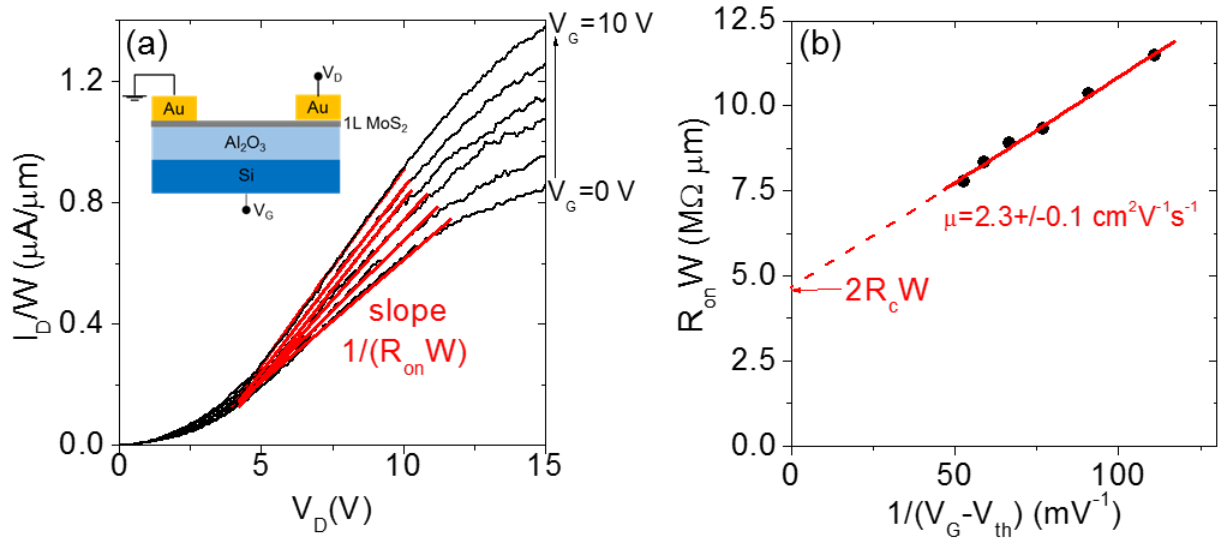

**Figure S7** (a) Fitting of the linear region of the output characteristics ( $I_D/W$  vs  $V_D$ ) of the back-gated 1L MoS<sub>2</sub> FET to evaluate the on-resistance  $R_{on}W$ . (b) Plot of  $R_{on}W$  vs  $1/(V_G - V_{th})$  and linear fit with the equation  $R_{on}W = 2R_cW + L/[\mu C_{ox}(V_G - V_{th})]$ , where  $R_cW$  is the contact resistance,  $L = 10 \mu\text{m}$  is the channel length,  $\mu$  is the electron mobility,  $C_{ox}$  is the capacitance density of 100 nm Al<sub>2</sub>O<sub>3</sub>,  $V_{th} = -9$  V is the threshold voltage. A contact resistance  $R_cW \approx 2 \text{ M}\Omega \mu\text{m}$  and a mobility  $\mu = 2.3 \pm 0.1 \text{ cm}^2 \text{V}^{-1} \text{s}^{-1}$  were evaluated from the linear fit.
